# Supplementary material for: Using Structural Equation Modeling to Reproduce and Extend ANOVA-Based Generalizability Theory Analyses for Psychological Assessments
Source: MDPI journal article supplement (doi:10.3390/psych5020019), 2023-04-13
Supplement: s1 [file s1]

## Instructional Online Supplement to

# “Using Structural Equation Modeling to Reproduce and Extend ANOVA-based Generalizability Theory Analyses for Psychological Assessments”

Walter P. Vispoel, Hyeryung Lee, Tingting Chen, & Hyeri Hong

## Table of Contents

|                                                                                  |    |
|----------------------------------------------------------------------------------|----|
| 1. GT Analyses Using <i>GENOVA</i> .....                                         | 2  |
| 1.1. Data Preparation for <i>GENOVA</i> Analyses.....                            | 2  |
| 1.2. <i>GENOVA</i> Sample Control Card for $p \times i$ Design .....             | 3  |
| 1.3. <i>GENOVA</i> Sample Control Card for $p \times i \times o$ Design.....     | 4  |
| 2. GT Analysis using the R <i>lavaan</i> Package.....                            | 5  |
| 2.1. Data Preparation for <i>lavaan</i> GT analyses .....                        | 5  |
| 2.2. Descriptive Statistics and Reliabilities - Occasions 1 & 2 .....            | 6  |
| 2.3. $p \times i$ design using <i>lavaan</i> - Occasion 1 .....                  | 6  |
| 2.4. $p \times i \times o$ design using <i>lavaan</i> .....                      | 10 |
| 3. Tables with Key Formulas for Illustrated Generalizability Theory Designs..... | 19 |
| 4. Abbreviations Used Throughout the Supplement.....                             | 21 |
| References.....                                                                  | 22 |

## 1. GT Analyses Using GENOVA

GENOVA (Crick & Brennan, 1983) is an ANSI FORTRAN computer program used for univariate generalizability analyses with complete, balanced designs. It has both G and D study capabilities. 'GENOVA' and its manual can be downloaded from the following website:

<http://www.education.uiowa.edu/centers/casma/computer-programs>.

Data used in this supplement represent responses to IPIP-BFM-100 Extraversion scale (20 items on a 5-point scale; see Goldberg, 1999) for two separate occasions.

### 1.1. Data Preparation for GENOVA Analyses

When using 'GENOVA' to perform G-theory analysis, data must be arranged in a wide format that has a column for each variable. Tables S1 and S2 depict this wide format.

**Table S1.** Example Data Structure for GENOVA  $p \times i$  design — Occasion 1

| ID | Time1_Item1 | Time1_Item2 | Time1_Item3 | ... | Time1_Item20 |
|----|-------------|-------------|-------------|-----|--------------|
| 1  | 1           | 4           | 4           | ... | 4            |
| 2  | 2           | 2           | 3           | ... | 2            |
| 3  | 2           | 4           | 4           | ... | 2            |
| 4  | 3           | 4           | 4           | ... | 2            |
| 5  | 2           | 2           | 2           | ... | 3            |

Corresponding input text file for this structure is as follows for the first 5 observations:

|                                         |          |
|-----------------------------------------|----------|
| 1 4 4 2 4 4 1 2 1 4 4 3 4 4 1 5 4 2 3 4 | PERSON 1 |
| 2 2 3 2 3 3 2 2 2 1 3 2 3 3 3 3 3 2 3 2 | PERSON 2 |
| 2 4 4 4 4 4 4 2 3 4 4 4 3 4 4 4 4 5 4 2 | PERSON 3 |
| 3 4 4 4 4 4 4 3 4 3 4 3 2 4 4 4 4 5 4 2 | PERSON 4 |
| 2 2 2 2 2 3 1 2 2 2 3 2 3 2 3 1 3 1 2 3 | PERSON 5 |

**Table S2.** Example Data Structure for GENOVA  $p \times i \times o$  design

| I<br>D | Time1_Item<br>1 | Time1_Item<br>2 | ... | Time1_Item2<br>0 | Time2_Item<br>1 | Time2_Item<br>2 | ... | Time2_Item2<br>0 |
|--------|-----------------|-----------------|-----|------------------|-----------------|-----------------|-----|------------------|
| 1      | 1               | 4               | ... | 4                | 1               | 4               | ... | 4                |
| 2      | 2               | 2               | ... | 2                | 2               | 2               | ... | 2                |
| 3      | 2               | 4               | ... | 2                | 3               | 4               | ... | 4                |
| 4      | 3               | 4               | ... | 2                | 4               | 4               | ... | 4                |
| 5      | 2               | 2               | ... | 3                | 3               | 3               | ... | 3                |

Corresponding input text file for this structure is as follows for the first 5 observations:

|                                                                                 |          |
|---------------------------------------------------------------------------------|----------|
| 1 4 4 2 4 4 1 2 1 4 4 3 4 4 1 5 4 2 3 4 1 4 4 2 4 4 1 2 2 2 4 4 4 2 4 4 2 2 4   | PERSON 1 |
| 2 2 3 2 3 3 2 2 2 1 3 2 3 3 3 3 3 2 2 2 4 4 3 3 2 2 2 1 3 2 3 3 3 3 2 3 2       | PERSON 2 |
| 2 4 4 4 4 4 4 2 3 4 4 4 3 4 4 4 4 5 4 2 3 4 4 4 4 4 2 4 2 4 4 2 4 3 4 4 5 4 4   | PERSON 3 |
| 3 4 4 4 4 4 4 3 4 3 4 3 2 4 4 4 4 5 4 2 4 4 4 4 4 5 4 4 3 3 3 4 3 4 4 4 4 4 4   | PERSON 4 |
| 2 2 2 2 2 3 1 2 2 2 3 2 3 2 3 1 3 1 2 3 3 3 3 2 2 3 2 2 3 2 3 2 4 2 3 2 3 2 3 3 | PERSON 5 |

## 1.2. GENOVA Sample Control Card for $p \times i$ Design

```
GSTUDY      IPIP-BFM-100 Extraversion - p x i Occasion 1
OPTIONS     RECORDS 10
EFFECT      * P 359 0
EFFECT      + I 20 0
FORMAT      (20F2.0)
PROCESS     7
DSTUDY      IPIP-BFM-100 Extraversion - p x i Occasion 1
DOPTIONS    NEGATIVE
DEFFECT     $ P
DEFFECT     I 20
ENDDSTUDY
FINISH
```

- First EFFECT card: Number of observations for 'P' = 359; The '0' indicates 'P' is a random effect
- Second EFFECT card: Number of items = 5; The '0' indicates 'I' is a random effect
- FORMAT card: Number of variables per row = 20
- PROCESS card: GENOVA would request an input data file associated with the integer parameter of 7
- DOPTIONS card: Do not replace negative variances with zero
- First DEFFECT card: The default sample size of 'P' (n = 359) from the G study is applied to the D study
- Second DEFFECT card: Number of items for the D study = 20

Output from the above control card is shown below:

|                                                                                        |         |                                        |                                                                               |                                                   |         |
|----------------------------------------------------------------------------------------|---------|----------------------------------------|-------------------------------------------------------------------------------|---------------------------------------------------|---------|
| OBJECT OF MEASUREMENT : P                                                              |         |                                        | FACETS : I                                                                    |                                                   |         |
| G STUDY POPULATION SIZE : INFINITE                                                     |         |                                        | G STUDY UNIVERSE SIZES : INFINITE                                             |                                                   |         |
| D STUDY POPULATION SIZE : INFINITE                                                     |         |                                        | D STUDY UNIVERSE SIZES : INFINITE                                             |                                                   |         |
| D STUDY SAMPLE SIZE : 359                                                              |         |                                        | D STUDY SAMPLE SIZES : 20                                                     |                                                   |         |
| -----                                                                                  |         |                                        |                                                                               |                                                   |         |
| VARIANCE COMPONENTS IN TERMS OF<br>G STUDY UNIVERSE (OF ADMISSIBLE OBSERVATIONS) SIZES |         |                                        | VARIANCE COMPONENTS IN TERMS OF<br>D STUDY UNIVERSE (OF GENERALIZATION) SIZES |                                                   |         |
| -----                                                                                  |         |                                        |                                                                               |                                                   |         |
|                                                                                        |         | VARIANCE COMPONENTS<br>FOR MEAN SCORES |                                                                               | VARIANCE COMPONENTS<br>FOR MEAN SCORES            |         |
|                                                                                        |         | FINITE D STUDY                         |                                                                               | FINITE D STUDY                                    |         |
|                                                                                        |         | UNIVERSE SAMPLING                      |                                                                               | UNIVERSE SAMPLING                                 |         |
|                                                                                        |         | COR- FRE-                              |                                                                               | COR- FRE-                                         |         |
|                                                                                        |         | RECTIONS QUENCIES                      |                                                                               | RECTIONS QUENCIES                                 |         |
|                                                                                        |         | ESTIMATES                              | STANDARD                                                                      | ESTIMATES                                         |         |
|                                                                                        |         | OBSERVATIONS                           | ERRORS                                                                        | OBSERVATIONS                                      |         |
| -----                                                                                  |         |                                        |                                                                               |                                                   |         |
| EFFECT                                                                                 |         |                                        |                                                                               |                                                   |         |
| P                                                                                      | 0.43496 | 1.0000                                 | 1                                                                             | 0.43496                                           | 0.03510 |
| I                                                                                      | 0.17115 | 1.0000                                 | 20                                                                            | 0.00856                                           | 0.00267 |
| PI                                                                                     | 0.71871 | 1.0000                                 | 20                                                                            | 0.03594                                           | 0.00062 |
| -----                                                                                  |         |                                        |                                                                               |                                                   |         |
| QFM = QUADRATIC FORM                                                                   |         |                                        |                                                                               |                                                   |         |
| -----                                                                                  |         |                                        |                                                                               |                                                   |         |
|                                                                                        |         | STANDARD                               | STANDARD                                                                      |                                                   |         |
|                                                                                        |         | VARIANCE                               | ERROR OF                                                                      |                                                   |         |
|                                                                                        |         | DEVIATION                              | VARIANCE                                                                      |                                                   |         |
|                                                                                        |         |                                        |                                                                               |                                                   |         |
| UNIVERSE SCORE                                                                         |         | 0.43496                                | 0.65951                                                                       | 0.03510                                           |         |
| EXPECTED OBSERVED SCORE                                                                |         | 0.47089                                | 0.68622                                                                       | 0.03510                                           |         |
| LOWER CASE DELTA                                                                       |         | 0.03594                                | 0.18957                                                                       | 0.00062                                           |         |
| UPPER CASE DELTA                                                                       |         | 0.04449                                | 0.21093                                                                       | 0.00274                                           |         |
| MEAN                                                                                   |         | 0.00987                                | 0.09934                                                                       |                                                   |         |
|                                                                                        |         |                                        |                                                                               | GENERALIZABILITY COEFFICIENT = 0.92369 (12.10372) |         |
|                                                                                        |         |                                        |                                                                               | PHI = 0.90720 ( 9.77579)                          |         |

### 1.3. GENOVA Sample Control Card for $p \times i \times o$ Design

```

GSTUDY      IPIP-BFM-100 Extraversion - p x i x o
OPTIONS     RECORDS 10
EFFECT      * P 359 0
EFFECT      0 2 0
EFFECT      I 20 0
FORMAT      (40F2.0)
PROCESS     9
DSTUDY      IPIP-BFM-100 Extraversion - p x i x o
DOPTIONS    NEGATIVE
DEFFECT     $ P
DEFFECT     0 1
DEFFECT     I 20
ENDDSTUDY
FINISH

```

- First EFFECT card: Number of observations for 'P' = 359; The '0' indicates 'P' is a random effect
- Second EFFECT card: Number of occasions = 5; The '0' indicates 'O' is a random effect
- Third EFFECT card: Number of items = 5; The '0' indicates 'I' is a random effect
- FORMAT card: Number of variables per row = 40
- PROCESS card: GENOVA would request an input data file associated with the integer parameter of 9
- DOPTIONS card: Do not replace negative variances with zero
- First DEFFECT card: The default sample size of 'P' (n = 359) from the G study is applied to the D study

- Second DEFFECT card: Number of occasions for the D study = 1
- Third DEFFECT card: Number of items for the D study = 20

Output from the above control card is shown below:

|                                                                                        |                                                      |                                        |                                         |                                        |                    |                                                                               |                                        |                                                   |                                        |                    |  |
|----------------------------------------------------------------------------------------|------------------------------------------------------|----------------------------------------|-----------------------------------------|----------------------------------------|--------------------|-------------------------------------------------------------------------------|----------------------------------------|---------------------------------------------------|----------------------------------------|--------------------|--|
| OBJECT OF MEASUREMENT : P                                                              |                                                      |                                        | FACETS : O                              |                                        |                    | I                                                                             |                                        |                                                   |                                        |                    |  |
| G STUDY POPULATION SIZE : INFINITE                                                     |                                                      |                                        | G STUDY UNIVERSE SIZES : INFINITE       |                                        |                    | INFINITE                                                                      |                                        |                                                   |                                        |                    |  |
| D STUDY POPULATION SIZE : INFINITE                                                     |                                                      |                                        | D STUDY UNIVERSE SIZES : INFINITE       |                                        |                    | INFINITE                                                                      |                                        |                                                   |                                        |                    |  |
| D STUDY SAMPLE SIZE : 359                                                              |                                                      |                                        | D STUDY SAMPLE SIZES : 1                |                                        |                    | 20                                                                            |                                        |                                                   |                                        |                    |  |
| VARIANCE COMPONENTS IN TERMS OF<br>G STUDY UNIVERSE (OF ADMISSIBLE OBSERVATIONS) SIZES |                                                      |                                        |                                         |                                        |                    | VARIANCE COMPONENTS IN TERMS OF<br>D STUDY UNIVERSE (OF GENERALIZATION) SIZES |                                        |                                                   |                                        |                    |  |
| EFFECT                                                                                 | VARIANCE<br>COMPONENTS<br>FOR SINGLE<br>OBSERVATIONS | FINITE<br>UNIVERSE<br>COR-<br>RECTIONS | D STUDY<br>SAMPLING<br>FRE-<br>QUENCIES | VARIANCE COMPONENTS<br>FOR MEAN SCORES |                    | VARIANCE<br>COMPONENTS<br>FOR SINGLE<br>OBSERVATIONS                          | FINITE<br>UNIVERSE<br>COR-<br>RECTIONS | D STUDY<br>SAMPLING<br>FRE-<br>QUENCIES           | VARIANCE COMPONENTS<br>FOR MEAN SCORES |                    |  |
|                                                                                        |                                                      |                                        |                                         | ESTIMATES                              | STANDARD<br>ERRORS |                                                                               |                                        |                                                   | ESTIMATES                              | STANDARD<br>ERRORS |  |
| P                                                                                      | 0.42853                                              | 1.0000                                 | 1                                       | 0.42853                                | 0.03471            | 0.42853                                                                       | 1.0000                                 | 1                                                 | 0.42853                                | 0.03471            |  |
| O                                                                                      | 0.00132                                              | 1.0000                                 | 1                                       | 0.00132                                | 0.00122            | 0.00132                                                                       | 1.0000                                 | 1                                                 | 0.00132                                | 0.00122            |  |
| I                                                                                      | 0.15136                                              | 1.0000                                 | 20                                      | 0.00757                                | 0.00237            | 0.15136                                                                       | 1.0000                                 | 20                                                | 0.00757                                | 0.00237            |  |
| PO                                                                                     | 0.02070                                              | 1.0000                                 | 1                                       | 0.02070                                | 0.00269            | 0.02070                                                                       | 1.0000                                 | 1                                                 | 0.02070                                | 0.00269            |  |
| PI                                                                                     | 0.37452                                              | 1.0000                                 | 20                                      | 0.01873                                | 0.00047            | 0.37452                                                                       | 1.0000                                 | 20                                                | 0.01873                                | 0.00047            |  |
| OI                                                                                     | 0.00147                                              | 1.0000                                 | 20                                      | 0.00007                                | 0.00004            | 0.00147                                                                       | 1.0000                                 | 20                                                | 0.00007                                | 0.00004            |  |
| POI                                                                                    | 0.30498                                              | 1.0000                                 | 20                                      | 0.01525                                | 0.00026            | 0.30498                                                                       | 1.0000                                 | 20                                                | 0.01525                                | 0.00026            |  |
| QFM = QUADRATIC FORM                                                                   |                                                      |                                        |                                         |                                        |                    |                                                                               |                                        |                                                   |                                        |                    |  |
|                                                                                        |                                                      |                                        |                                         |                                        |                    |                                                                               |                                        |                                                   |                                        |                    |  |
|                                                                                        |                                                      |                                        |                                         | STANDARD<br>VARIANCE                   |                    | STANDARD<br>ERROR OF<br>VARIANCE                                              |                                        |                                                   |                                        |                    |  |
| UNIVERSE SCORE                                                                         |                                                      |                                        |                                         | 0.42853                                | 0.65462            | 0.03471                                                                       |                                        |                                                   |                                        |                    |  |
| EXPECTED OBSERVED SCORE                                                                |                                                      |                                        |                                         | 0.48321                                | 0.69513            | 0.03470                                                                       |                                        |                                                   |                                        |                    |  |
| LOWER CASE DELTA                                                                       |                                                      |                                        |                                         | 0.05468                                | 0.23383            | 0.00272                                                                       |                                        | GENERALIZABILITY COEFFICIENT = 0.88684 ( 7.83728) |                                        |                    |  |
| UPPER CASE DELTA                                                                       |                                                      |                                        |                                         | 0.06364                                | 0.25228            | 0.00380                                                                       |                                        | PHI = 0.87069 ( 6.73320)                          |                                        |                    |  |
| MEAN                                                                                   |                                                      |                                        |                                         | 0.01031                                | 0.10155            |                                                                               |                                        |                                                   |                                        |                    |  |

## 2. GT Analysis using the R *lavaan* Package

The *lavaan* package in R (Rosseel, 2012; Rosseel et al., 2023) is a free open-source package for latent variable modeling. Sample code is provided below for using the package for GT analyses, including estimation of variance components, G coefficients, and D coefficients as well as their respective Monte Carlo confidence intervals for the  $p \times i$  and  $p \times i \times o$  designs.

### 2.1. Data Preparation for *lavaan* GT analyses

Data again represent responses to IPIP-BFM-100 Extraversion scale (20 items on a 5-point scale; see Goldberg, 1999) for two separate occasions. Following essential data cleaning, the dataset as well as relevant R libraries are loaded. These libraries include: *lavaan* (Rosseel, 2012; Rosseel et al., 2023), *semTools* (Jorgensen et al., 2022), *psych* (Revelle, 2022), *dplyr* (Wickham et al., 2015), *lemon* (Edwards, 2019), and *knitr* (Xie, 2022). All item variables are renamed in the format of t1\_1-t1\_20 for Occasion 1 and t2\_1-t2\_20 for Occasion 2.

```
library(lavaan)
library(semTools)
```

```

library(psych)
library(dplyr)
library(lemon)
library(knitr)
knit_print.data.frame <- lemon_print
options(scipen = 100)

ipip <- read.csv('IPIP_ext.csv')
names(ipip)<- c(paste0("t",1,"_",1:20),paste0("t",2,"_",1:20))

```

## 2.2. Descriptive Statistics and Reliabilities - Occasions 1 & 2

```

rel <- data.frame("IPIP" = c(mean(rowSums(ipip[,1:20], na.rm = TRUE)),sd(rowSums(ipip[,1:20], na.rm = TRUE)),alpha(ipip[,1:20], na.rm = TRUE)$total$raw_alpha, mean(rowSums(ipip[,21:40]), na.rm = TRUE),sd(rowSums(ipip[,21:40]), na.rm = TRUE),alpha(ipip[,21:40], na.rm = TRUE)$total$raw_alpha, cor(rowSums(ipip[,1:20], na.rm = TRUE), rowSums(ipip[,21:40], na.rm = TRUE))))
row.names(rel) <- c("Occasion 1 Mean", "Occasion 1 SD","Occasion 1 Alpha",
                   "Occasion 2 Mean", "Occasion 2 SD","Occasion 2 Alpha",
                   "Test-retest")

rel

```

```

##              IPIP
## Occasion 1 Mean  64.2200557
## Occasion 1 SD    13.7243021
## Occasion 1 Alpha  0.9236858
## Occasion 2 Mean  65.3147632
## Occasion 2 SD    14.0787323
## Occasion 2 Alpha  0.9353930
## Test-retest      0.9258974

```

## 2.3. $p \times i$ design using *lavaan* - Occasion 1

R code for estimating ULS and WLSMV estimates for variance components and reliability-like coefficients for the  $p \times i$  design (Occasion 1 only) using the *lavaan* package is shown below.

```

## Specify the model

model_pi <- '
# Define person factor
Person =~ 1*t1_1 + 1*t1_2 + 1*t1_3 + 1*t1_4 + 1*t1_5 +
1*t1_6 + 1*t1_7 + 1*t1_8 + 1*t1_9 + 1*t1_10 +
1*t1_11 + 1*t1_12 + 1*t1_13 + 1*t1_14 + 1*t1_15 +
1*t1_16 + 1*t1_17 + 1*t1_18 + 1*t1_19 + 1*t1_20

# Specify person factor mean and variance
Person ~ mu_p*1
Person ~~ v_p*Person

# Specify item intercepts

```

```

t1_1 ~ mu1*1
t1_2 ~ mu2*1
t1_3 ~ mu3*1
t1_4 ~ mu4*1
t1_5 ~ mu5*1
t1_6 ~ mu6*1
t1_7 ~ mu7*1
t1_8 ~ mu8*1
t1_9 ~ mu9*1
t1_10 ~ mu10*1
t1_11 ~ mu11*1
t1_12 ~ mu12*1
t1_13 ~ mu13*1
t1_14 ~ mu14*1
t1_15 ~ mu15*1
t1_16 ~ mu16*1
t1_17 ~ mu17*1
t1_18 ~ mu18*1
t1_19 ~ mu19*1
t1_20 ~ mu20*1

# Apply effect-coding constraints
mu20 == -1*(mu1 + mu2 + mu3 + mu4 + mu5 +
            mu6 + mu7 + mu8 + mu9 + mu10 +
            mu11 + mu12 + mu13 + mu14 + mu15 +
            mu16 + mu17 + mu18 + mu19)

# Define item variance
v_i := (mu1^2 + mu2^2 + mu3^2 + mu4^2 + mu5^2 +
        mu6^2 + mu7^2 + mu8^2 + mu9^2 + mu10^2 +
        mu11^2 + mu12^2 + mu13^2 + mu14^2 + mu15^2 +
        mu16^2 + mu17^2 + mu18^2 + mu19^2 + mu20^2)/(20-1)

# Specify p x i interaction variance (+ error)
t1_1 ~~ v_pi*t1_1
t1_2 ~~ v_pi*t1_2
t1_3 ~~ v_pi*t1_3
t1_4 ~~ v_pi*t1_4
t1_5 ~~ v_pi*t1_5
t1_6 ~~ v_pi*t1_6
t1_7 ~~ v_pi*t1_7
t1_8 ~~ v_pi*t1_8
t1_9 ~~ v_pi*t1_9
t1_10 ~~ v_pi*t1_10
t1_11 ~~ v_pi*t1_11
t1_12 ~~ v_pi*t1_12
t1_13 ~~ v_pi*t1_13
t1_14 ~~ v_pi*t1_14
t1_15 ~~ v_pi*t1_15
t1_16 ~~ v_pi*t1_16

```

```

t1_17 ~~ v_pi*t1_17
t1_18 ~~ v_pi*t1_18
t1_19 ~~ v_pi*t1_19
t1_20 ~~ v_pi*t1_20

# Define variance components and G, global D, and cut-score specific D
# coefficients
## Number of items = 20; Number of people = 359
## Cut score = 2 standard deviations away from the mean
vc_p := v_p
vc_pi := v_pi
vc_i := v_i
G := v_p / (v_p + v_pi/20)
D := v_p / (v_p + v_pi/20 + v_i/20)
CS_D := (v_p + (4*v_p/G - v_p/359 - v_pi/(359*20) - v_i/20)) /
(v_p + (4*v_p/G - v_p/359 - v_pi/(359*20) - v_i/20) + v_pi/20 + v_i/20)
## Correction for bias applied '

## Specify item thresholds for WLSMV estimation

thre_pi <-
't1_1 |thr_1*t1 + thr_2*t2 + thr_3*t3 + thr_4*t4
t1_2 |thr_1*t1 + thr_2*t2 + thr_3*t3 + thr_4*t4
t1_3 |thr_1*t1 + thr_2*t2 + thr_3*t3 + thr_4*t4
t1_4 |thr_1*t1 + thr_2*t2 + thr_3*t3 + thr_4*t4
t1_5 |thr_1*t1 + thr_2*t2 + thr_3*t3 + thr_4*t4
t1_6 |thr_1*t1 + thr_2*t2 + thr_3*t3 + thr_4*t4
t1_7 |thr_1*t1 + thr_2*t2 + thr_3*t3 + thr_4*t4
t1_8 |thr_1*t1 + thr_2*t2 + thr_3*t3 + thr_4*t4
t1_9 |thr_1*t1 + thr_2*t2 + thr_3*t3 + thr_4*t4
t1_10 |thr_1*t1 + thr_2*t2 + thr_3*t3 + thr_4*t4
t1_11 |thr_1*t1 + thr_2*t2 + thr_3*t3 + thr_4*t4
t1_12 |thr_1*t1 + thr_2*t2 + thr_3*t3 + thr_4*t4
t1_13 |thr_1*t1 + thr_2*t2 + thr_3*t3 + thr_4*t4
t1_14 |thr_1*t1 + thr_2*t2 + thr_3*t3 + thr_4*t4
t1_15 |thr_1*t1 + thr_2*t2 + thr_3*t3 + thr_4*t4
t1_16 |thr_1*t1 + thr_2*t2 + thr_3*t3 + thr_4*t4
t1_17 |thr_1*t1 + thr_2*t2 + thr_3*t3 + thr_4*t4
t1_18 |thr_1*t1 + thr_2*t2 + thr_3*t3 + thr_4*t4
t1_19 |thr_1*t1 + thr_2*t2 + thr_3*t3 + thr_4*t4
t1_20 |thr_1*t1 + thr_2*t2 + thr_3*t3 + thr_4*t4'

## Get estimates of variance components and reliability-like coefficient
## using ULS

pi_uls <- lavaan(model_pi, data = ipip, estimator = "ULS")
uls_est <- select(data.frame(parameterEstimates(pi_uls)),label,est,se)

```



```
## Get Monte Carlo confidence intervals (90%) for the above ULS-based
## estimates

set.seed(1234)
uls_mc <- data.frame(monteCarloCI(pi_uls, level = 0.9))
uls_mc <- cbind(label= rownames(uls_mc),uls_mc) %>% subset(select=-est)

uls_all <- merge (uls_est, uls_mc, by = "label", sort=F) %>% filter(label %in%
% c("vc_p","vc_pi","vc_i","G","D","CS_D")) %>% subset(select=-label)
colnames(uls_all) = c("Estimate","Standard Error","90% CI - LL", "90% CI - UL
")
rownames(uls_all) = c("Person","Person x item and other error","Item","G coef
ficient","Global D coefficient","Cut-score specific D coefficient")
```

**Table S3.** Variance Components, G Coefficients, and D Coefficients for GT pi Observed Score Design

|                                  | Estimate | Standard Error | 90% CI - LL | 90% CI - UL |
|----------------------------------|----------|----------------|-------------|-------------|
| Person                           | 0.43496  | 0.00383        | 0.42860     | 0.44127     |
| Person x item and other error    | 0.71871  | 0.01242        | 0.69815     | 0.73928     |
| Item                             | 0.17315  | 0.01009        | 0.15937     | 0.19274     |
| G coefficient                    | 0.92369  | 0.00153        | 0.92112     | 0.92622     |
| Global D coefficient             | 0.90701  | 0.00184        | 0.90369     | 0.90976     |
| Cut-score specific D coefficient | 0.98105  | 0.00039        | 0.98034     | 0.98163     |

```
## Get estimates of variance components and reliability-like coefficients
## using WLSMV

pi_wlsmv <- lavaan(model = c(model_pi, thre_pi), data = ipip, estimator = "W
LSMV", parameterization = "theta", ordered = names(ipip[,1:20]))
wlsmv_est <- select(data.frame(parameterEstimates(pi_wlsmv)),label,est,se)

## Get Monte Carlo confidence intervals (90%) for the above WLSMV-based
## estimates

wlsmv_mc <- data.frame(monteCarloCI(pi_wlsmv, level = 0.9))
wlsmv_mc <- cbind(label= rownames(wlsmv_mc),wlsmv_mc) %>% subset(select=-est)

wlsmv_all <- merge (wlsmv_est, wlsmv_mc, by = "label", sort=F) %>% filter(lab
el %in% c("vc_p","vc_pi","vc_i","G","D","CS_D")) %>% subset(select=-label)
colnames(wlsmv_all) = c("Estimate","Standard Error","90% CI - LL", "90% CI -
UL")
rownames(wlsmv_all) = c("Person","Person x item and other error","Item","G co
efficient","Global D coefficient","Cut-score specific D coefficient")
```

**Table S4.** *Variance Components, G Coefficients, and D Coefficients for GT pi CLRV Design*

|                                      | Estimate | Standard Error | 90% CI - LL | 90% CI - UL |
|--------------------------------------|----------|----------------|-------------|-------------|
| Person                               | 1.85390  | 0.12720        | 1.64739     | 2.06039     |
| Person $\times$ item and other error | 1.98439  | 0.03194        | 1.93214     | 2.03673     |
| Item                                 | 0.60615  | 0.03828        | 0.55155     | 0.67745     |
| G coefficient                        | 0.94920  | 0.00334        | 0.94311     | 0.95409     |
| Global D coefficient                 | 0.93470  | 0.00425        | 0.92673     | 0.94083     |
| Cut-score specific D coefficient     | 0.98673  | 0.00088        | 0.98508     | 0.98799     |

## 2.4. $p \times i \times o$ design using *lavaan*

R code for estimating ULS and WLSMV estimates for variance components, reliability-like coefficients, and proportions of measurement error for the  $p \times i \times o$  design using the *lavaan* package is shown below.

```
model_pio <- '
# Define the person factor
Person =~ 1*t1_1 + 1*t1_2 + 1*t1_3 + 1*t1_4 + 1*t1_5 +
1*t1_6 + 1*t1_7 + 1*t1_8 + 1*t1_9 + 1*t1_10 +
1*t1_11 + 1*t1_12 + 1*t1_13 + 1*t1_14 + 1*t1_15 +
1*t1_16 + 1*t1_17 + 1*t1_18 + 1*t1_19 + 1*t1_20 +
1*t2_1 + 1*t2_2 + 1*t2_3 + 1*t2_4 + 1*t2_5 +
1*t2_6 + 1*t2_7 + 1*t2_8 + 1*t2_9 + 1*t2_10 +
1*t2_11 + 1*t2_12 + 1*t2_13 + 1*t2_14 + 1*t2_15 +
1*t2_16 + 1*t2_17 + 1*t2_18 + 1*t2_19 + 1*t2_20

# Define the item factors
Item1 =~ 1*t1_1 + 1*t2_1
Item2 =~ 1*t1_2 + 1*t2_2
Item3 =~ 1*t1_3 + 1*t2_3
Item4 =~ 1*t1_4 + 1*t2_4
Item5 =~ 1*t1_5 + 1*t2_5
Item6 =~ 1*t1_6 + 1*t2_6
Item7 =~ 1*t1_7 + 1*t2_7
Item8 =~ 1*t1_8 + 1*t2_8
Item9 =~ 1*t1_9 + 1*t2_9
Item10 =~ 1*t1_10 + 1*t2_10
Item11 =~ 1*t1_11 + 1*t2_11
Item12 =~ 1*t1_12 + 1*t2_12
Item13 =~ 1*t1_13 + 1*t2_13
Item14 =~ 1*t1_14 + 1*t2_14
Item15 =~ 1*t1_15 + 1*t2_15
Item16 =~ 1*t1_16 + 1*t2_16
Item17 =~ 1*t1_17 + 1*t2_17
Item18 =~ 1*t1_18 + 1*t2_18
Item19 =~ 1*t1_19 + 1*t2_19
Item20 =~ 1*t1_20 + 1*t2_20
```

```

# Define the occasion factors
Occasion1 =~ 1*t1_1 + 1*t1_2 + 1*t1_3 + 1*t1_4 + 1*t1_5 +
1*t1_6 + 1*t1_7 + 1*t1_8 + 1*t1_9 + 1*t1_10 +
1*t1_11 + 1*t1_12 + 1*t1_13 + 1*t1_14 + 1*t1_15 +
1*t1_16 + 1*t1_17 + 1*t1_18 + 1*t1_19 + 1*t1_20

Occasion2 =~ 1*t2_1 + 1*t2_2 + 1*t2_3 + 1*t2_4 + 1*t2_5 +
1*t2_6 + 1*t2_7 + 1*t2_8 + 1*t2_9 + 1*t2_10 +
1*t2_11 + 1*t2_12 + 1*t2_13 + 1*t2_14 + 1*t2_15 +
1*t2_16 + 1*t2_17 + 1*t2_18 + 1*t2_19 + 1*t2_20

# Specify factor means
Person ~ mu_p*1
Occasion1 ~ mu_o1*1
Occasion2 ~ mu_o2*1
Item1 ~ mu_i1*1
Item2 ~ mu_i2*1
Item3 ~ mu_i3*1
Item4 ~ mu_i4*1
Item5 ~ mu_i5*1
Item6 ~ mu_i6*1
Item7 ~ mu_i7*1
Item8 ~ mu_i8*1
Item9 ~ mu_i9*1
Item10 ~ mu_i10*1
Item11 ~ mu_i11*1
Item12 ~ mu_i12*1
Item13 ~ mu_i13*1
Item14 ~ mu_i14*1
Item15 ~ mu_i15*1
Item16 ~ mu_i16*1
Item17 ~ mu_i17*1
Item18 ~ mu_i18*1
Item19 ~ mu_i19*1
Item20 ~ mu_i20*1

# Specify item intercepts
t1_1 ~ mu1_1*1
t1_2 ~ mu1_2*1
t1_3 ~ mu1_3*1
t1_4 ~ mu1_4*1
t1_5 ~ mu1_5*1
t1_6 ~ mu1_6*1
t1_7 ~ mu1_7*1
t1_8 ~ mu1_8*1
t1_9 ~ mu1_9*1
t1_10 ~ mu1_10*1
t1_11 ~ mu1_11*1

```

```

t1_12 ~ mu1_12*1
t1_13 ~ mu1_13*1
t1_14 ~ mu1_14*1
t1_15 ~ mu1_15*1
t1_16 ~ mu1_16*1
t1_17 ~ mu1_17*1
t1_18 ~ mu1_18*1
t1_19 ~ mu1_19*1
t1_20 ~ mu1_20*1
t2_1 ~ mu2_1*1
t2_2 ~ mu2_2*1
t2_3 ~ mu2_3*1
t2_4 ~ mu2_4*1
t2_5 ~ mu2_5*1
t2_6 ~ mu2_6*1
t2_7 ~ mu2_7*1
t2_8 ~ mu2_8*1
t2_9 ~ mu2_9*1
t2_10 ~ mu2_10*1
t2_11 ~ mu2_11*1
t2_12 ~ mu2_12*1
t2_13 ~ mu2_13*1
t2_14 ~ mu2_14*1
t2_15 ~ mu2_15*1
t2_16 ~ mu2_16*1
t2_17 ~ mu2_17*1
t2_18 ~ mu2_18*1
t2_19 ~ mu2_19*1
t2_20 ~ mu2_20*1

# Apply effect-coding constraints
## Item intercepts sum to 0 for the person factor
mu2_20 == -1*(mu1_1 + mu1_2 + mu1_3 + mu1_4 + mu1_5 +
              mu1_6 + mu1_7 + mu1_8 + mu1_9 + mu1_10 +
              mu1_11 + mu1_12 + mu1_13 + mu1_14 + mu1_15 +
              mu1_16 + mu1_17 + mu1_18 + mu1_19 + mu1_20 +
              mu2_1 + mu2_2 + mu2_3 + mu2_4 + mu2_5 +
              mu2_6 + mu2_7 + mu2_8 + mu2_9 + mu2_10 +
              mu2_11 + mu2_12 + mu2_13 + mu2_14 + mu2_15 +
              mu2_16 + mu2_17 + mu2_18 + mu2_19)

## Item intercepts sum to 0 for the item factors
mu2_1 == -1*mu1_1
mu2_2 == -1*mu1_2
mu2_3 == -1*mu1_3
mu2_4 == -1*mu1_4
mu2_5 == -1*mu1_5
mu2_6 == -1*mu1_6
mu2_7 == -1*mu1_7
mu2_8 == -1*mu1_8

```

```

mu2_9 == -1*mu1_9
mu2_10 == -1*mu1_10
mu2_11 == -1*mu1_11
mu2_12 == -1*mu1_12
mu2_13 == -1*mu1_13
mu2_14 == -1*mu1_14
mu2_15 == -1*mu1_15
mu2_16 == -1*mu1_16
mu2_17 == -1*mu1_17
mu2_18 == -1*mu1_18
mu2_19 == -1*mu1_19
mu2_20 == -1*mu1_20

## Item intercepts sum to 0 for the occasion factors
mu1_20 == -1*(mu1_1 + mu1_2 + mu1_3 + mu1_4 + mu1_5 +
             mu1_6 + mu1_7 + mu1_8 + mu1_9 + mu1_10 +
             mu1_11 + mu1_12 + mu1_13 + mu1_14 + mu1_15 +
             mu1_16 + mu1_17 + mu1_18 + mu1_19)
mu2_20 == -1*(mu2_1 + mu2_2 + mu2_3 + mu2_4 + mu2_5 +
             mu2_6 + mu2_7 + mu2_8 + mu2_9 + mu2_10 +
             mu2_11 + mu2_12 + mu2_13 + mu2_14 + mu2_15 +
             mu2_16 + mu2_17 + mu2_18 + mu2_19)

## Item factor means sum to 0
mu_i20 == -1*(mu_i1 + mu_i2 + mu_i3 + mu_i4 + mu_i5 +
             mu_i6 + mu_i7 + mu_i8 + mu_i9 + mu_i10 +
             mu_i11 + mu_i12 + mu_i13 + mu_i14 + mu_i15 +
             mu_i16 + mu_i17 + mu_i18 + mu_i19)

## Occasion factor means sum to 0
mu_o2 == -1 *(mu_o1)

# Specify person factor variance
Person ~~ v_p*Person

# Identify item factor variance
v_i := (mu_i1^2 + mu_i2^2 + mu_i3^2 + mu_i4^2 + mu_i5^2 +
        mu_i6^2 + mu_i7^2 + mu_i8^2 + mu_i9^2 + mu_i10^2 +
        mu_i11^2 + mu_i12^2 + mu_i13^2 + mu_i14^2 + mu_i15^2 +
        mu_i16^2 + mu_i17^2 + mu_i18^2 + mu_i19^2 + mu_i20^2)/19

# Identify occasion factor variance
v_o := (mu_o1^2 + mu_o2^2)/1

# Identify i x o interaction variance
v_io := (mu1_1^2 + mu1_2^2 + mu1_3^2 + mu1_4^2 + mu1_5^2 +
         mu1_6^2 + mu1_7^2 + mu1_8^2 + mu1_9^2 + mu1_10^2 +
         mu1_11^2 + mu1_12^2 + mu1_13^2 + mu1_14^2 + mu1_15^2 +
         mu1_16^2 + mu1_17^2 + mu1_18^2 + mu1_19^2 + mu1_20^2 +

```

```

mu2_1^2 + mu2_2^2 + mu2_3^2 + mu2_4^2 + mu2_5^2 +
mu2_6^2 + mu2_7^2 + mu2_8^2 + mu2_9^2 + mu2_10^2 +
mu2_11^2 + mu2_12^2 + mu2_13^2 + mu2_14^2 + mu2_15^2 +
mu2_16^2 + mu2_17^2 + mu2_18^2 + mu2_19^2 + mu2_20^2)/39

# Identify p x i interaction variance
Item1 ~~ v_pi*Item1
Item2 ~~ v_pi*Item2
Item3 ~~ v_pi*Item3
Item4 ~~ v_pi*Item4
Item5 ~~ v_pi*Item5
Item6 ~~ v_pi*Item6
Item7 ~~ v_pi*Item7
Item8 ~~ v_pi*Item8
Item9 ~~ v_pi*Item9
Item10 ~~ v_pi*Item10
Item11 ~~ v_pi*Item11
Item12 ~~ v_pi*Item12
Item13 ~~ v_pi*Item13
Item14 ~~ v_pi*Item14
Item15 ~~ v_pi*Item15
Item16 ~~ v_pi*Item16
Item17 ~~ v_pi*Item17
Item18 ~~ v_pi*Item18
Item19 ~~ v_pi*Item19
Item20 ~~ v_pi*Item20

# Identify p x o interaction variance
Occasion1 ~~ v_po*Occasion1
Occasion2 ~~ v_po*Occasion2

# Identify p x i x o interaction variance (+ error)
t1_1 ~~ v_pio*t1_1
t1_2 ~~ v_pio*t1_2
t1_3 ~~ v_pio*t1_3
t1_4 ~~ v_pio*t1_4
t1_5 ~~ v_pio*t1_5
t1_6 ~~ v_pio*t1_6
t1_7 ~~ v_pio*t1_7
t1_8 ~~ v_pio*t1_8
t1_9 ~~ v_pio*t1_9
t1_10 ~~ v_pio*t1_10
t1_11 ~~ v_pio*t1_11
t1_12 ~~ v_pio*t1_12
t1_13 ~~ v_pio*t1_13
t1_14 ~~ v_pio*t1_14
t1_15 ~~ v_pio*t1_15
t1_16 ~~ v_pio*t1_16
t1_17 ~~ v_pio*t1_17
t1_18 ~~ v_pio*t1_18

```

```

t1_19 ~~ v_pio*t1_19
t1_20 ~~ v_pio*t1_20
t2_1  ~~ v_pio*t2_1
t2_2  ~~ v_pio*t2_2
t2_3  ~~ v_pio*t2_3
t2_4  ~~ v_pio*t2_4
t2_5  ~~ v_pio*t2_5
t2_6  ~~ v_pio*t2_6
t2_7  ~~ v_pio*t2_7
t2_8  ~~ v_pio*t2_8
t2_9  ~~ v_pio*t2_9
t2_10 ~~ v_pio*t2_10
t2_11 ~~ v_pio*t2_11
t2_12 ~~ v_pio*t2_12
t2_13 ~~ v_pio*t2_13
t2_14 ~~ v_pio*t2_14
t2_15 ~~ v_pio*t2_15
t2_16 ~~ v_pio*t2_16
t2_17 ~~ v_pio*t2_17
t2_18 ~~ v_pio*t2_18
t2_19 ~~ v_pio*t2_19
t2_20 ~~ v_pio*t2_20

# Define variance components, and G, global D, and cut-score specific D
# coefficients
## Number of items = 20; Number of occasions = 1; Number of people = 359
## Cut score = 2 standard deviations away from the mean
vc_p := v_p
vc_pi := v_pi
vc_po := v_po
vc_pio := v_pio
vc_i := v_i
vc_o := v_o
vc_io := v_io
G := v_p / (v_p + v_pi/20 + v_po/1 + v_pio/(20*1))
SFE := (v_pi/20)/ (v_p + v_pi/20 + v_po/1 + v_pio/(20*1))
TE := (v_po/1)/ (v_p + v_pi/20 + v_po/1 + v_pio/(20*1))
RRE := (v_pio/20)/ (v_p + v_pi/20 + v_po/1 + v_pio/(20*1))
D := v_p / (v_p + v_pi/20 + v_po/1 + v_pio/(20*1) + v_i/20 + v_o/1 + v_io/(
20*1))
CS_D := (v_p + (4*v_p/G-v_p/359-v_pi/(359*20)-v_po/(359*1)-v_pio/(359*20*1)
-v_i/20-v_o/1-v_io/(20*1))) /
(v_p + (4*v_p/G-v_p/359-v_pi/(359*20)-v_po/(359*1)-v_pio/(359*20*1)-v_i/20-
v_o/1-v_io/(20*1)) +
v_pi/20 + v_po/1 + v_pio/(20*1) + v_i/20 + v_o/1 + v_io/(20*1))
## Correction for bias applied '

## Specify item thresholds for WLSMV estimation
thre_pio <- 't1_1 |thr_1*t1 + thr_2*t2 + thr_3*t3 + thr_4*t4
t1_2 |thr_1*t1 + thr_2*t2 + thr_3*t3 + thr_4*t4

```

```

t1_3 | thr_1*t1 + thr_2*t2 + thr_3*t3 + thr_4*t4
t1_4 | thr_1*t1 + thr_2*t2 + thr_3*t3 + thr_4*t4
t1_5 | thr_1*t1 + thr_2*t2 + thr_3*t3 + thr_4*t4
t1_6 | thr_1*t1 + thr_2*t2 + thr_3*t3 + thr_4*t4
t1_7 | thr_1*t1 + thr_2*t2 + thr_3*t3 + thr_4*t4
t1_8 | thr_1*t1 + thr_2*t2 + thr_3*t3 + thr_4*t4
t1_9 | thr_1*t1 + thr_2*t2 + thr_3*t3 + thr_4*t4
t1_10 | thr_1*t1 + thr_2*t2 + thr_3*t3 + thr_4*t4
t1_11 | thr_1*t1 + thr_2*t2 + thr_3*t3 + thr_4*t4
t1_12 | thr_1*t1 + thr_2*t2 + thr_3*t3 + thr_4*t4
t1_13 | thr_1*t1 + thr_2*t2 + thr_3*t3 + thr_4*t4
t1_14 | thr_1*t1 + thr_2*t2 + thr_3*t3 + thr_4*t4
t1_15 | thr_1*t1 + thr_2*t2 + thr_3*t3 + thr_4*t4
t1_16 | thr_1*t1 + thr_2*t2 + thr_3*t3 + thr_4*t4
t1_17 | thr_1*t1 + thr_2*t2 + thr_3*t3 + thr_4*t4
t1_18 | thr_1*t1 + thr_2*t2 + thr_3*t3 + thr_4*t4
t1_19 | thr_1*t1 + thr_2*t2 + thr_3*t3 + thr_4*t4
t1_20 | thr_1*t1 + thr_2*t2 + thr_3*t3 + thr_4*t4
t2_1 | thr_1*t1 + thr_2*t2 + thr_3*t3 + thr_4*t4
t2_2 | thr_1*t1 + thr_2*t2 + thr_3*t3 + thr_4*t4
t2_3 | thr_1*t1 + thr_2*t2 + thr_3*t3 + thr_4*t4
t2_4 | thr_1*t1 + thr_2*t2 + thr_3*t3 + thr_4*t4
t2_5 | thr_1*t1 + thr_2*t2 + thr_3*t3 + thr_4*t4
t2_6 | thr_1*t1 + thr_2*t2 + thr_3*t3 + thr_4*t4
t2_7 | thr_1*t1 + thr_2*t2 + thr_3*t3 + thr_4*t4
t2_8 | thr_1*t1 + thr_2*t2 + thr_3*t3 + thr_4*t4
t2_9 | thr_1*t1 + thr_2*t2 + thr_3*t3 + thr_4*t4
t2_10 | thr_1*t1 + thr_2*t2 + thr_3*t3 + thr_4*t4
t2_11 | thr_1*t1 + thr_2*t2 + thr_3*t3 + thr_4*t4
t2_12 | thr_1*t1 + thr_2*t2 + thr_3*t3 + thr_4*t4
t2_13 | thr_1*t1 + thr_2*t2 + thr_3*t3 + thr_4*t4
t2_14 | thr_1*t1 + thr_2*t2 + thr_3*t3 + thr_4*t4
t2_15 | thr_1*t1 + thr_2*t2 + thr_3*t3 + thr_4*t4
t2_16 | thr_1*t1 + thr_2*t2 + thr_3*t3 + thr_4*t4
t2_17 | thr_1*t1 + thr_2*t2 + thr_3*t3 + thr_4*t4
t2_18 | thr_1*t1 + thr_2*t2 + thr_3*t3 + thr_4*t4
t2_19 | thr_1*t1 + thr_2*t2 + thr_3*t3 + thr_4*t4
t2_20 | thr_1*t1 + thr_2*t2 + thr_3*t3 + thr_4*t4'

## Get estimates of variance components and reliability-like coefficient
## using ULS

pio_uls <- lavaan(model_pio, data = ipip, estimator = "ULS")
uls_est <- select(data.frame(parameterEstimates(pio_uls)),label,est,se)

## Get Monte Carlo confidence intervals (90%) for the above ULS-based
## estimates

set.seed(1234)

```



```

uls_mc <- data.frame(monteCarloCI(pio_uls, level = 0.9))
uls_mc <- cbind(label= rownames(uls_mc),uls_mc) %>% subset(select=-est)

uls_all <- merge (uls_est, uls_mc, by = "label", sort=F) %>% filter(label %in
% c("vc_p","vc_pi","vc_po","vc_pio","vc_i","vc_o","vc_io","SFE","TE","RRE","G
","D","CS_D")) %>% subset(select=-label)
colnames(uls_all) = c("Estimate","Standard Error","90% CI - LL", "90% CI - UL
")
rownames(uls_all) = c("Person","Person × item","Person × occasion","Person ×
item × occasion and other error","Item","Occasion","Item × occasion","G coeff
icient","Specific-factor error","Transient error","random-response error","Gl
obal D coefficient","Cut-score specific D coefficient")

```

**Table S5.** *G Coefficients, D Coefficients, and Partitioning of Variance for GT pio Observed Score Design*

|                                          | Estimate | Standard Error | 90% CI - LL | 90% CI - UL |
|------------------------------------------|----------|----------------|-------------|-------------|
| Person                                   | 0.42853  | 0.00271        | 0.42408     | 0.43293     |
| Person × item                            | 0.37452  | 0.01212        | 0.35445     | 0.39437     |
| Person × occasion                        | 0.02070  | 0.00383        | 0.01447     | 0.02704     |
| Person × item × occasion and other error | 0.30498  | 0.01497        | 0.28018     | 0.32943     |
| Item                                     | 0.15357  | 0.00672        | 0.14398     | 0.16621     |
| Occasion                                 | 0.00150  | 0.00091        | 0.00037     | 0.00342     |
| Item × occasion                          | 0.00113  | 0.00057        | 0.00141     | 0.00377     |
| G coefficient                            | 0.88684  | 0.00738        | 0.87470     | 0.89891     |
| Specific-factor error                    | 0.03875  | 0.00127        | 0.03666     | 0.04084     |
| Transient error                          | 0.04285  | 0.00778        | 0.03013     | 0.05564     |
| Random-response error                    | 0.03156  | 0.00157        | 0.02897     | 0.03414     |
| Global D coefficient                     | 0.87022  | 0.00739        | 0.85754     | 0.88173     |
| Cut-score specific D coefficient         | 0.97353  | 0.00152        | 0.97092     | 0.97588     |

**## Get estimates of variance components and reliability-like coefficient  
## using WLSMV**

```

pio_wlsmv <- lavaan(model = c(model_pio, thre_pio), data = ipip, estimator =
"WLSMV", parameterization = "theta", ordered = names(ipip))
wlsmv_est <- select(data.frame(parameterEstimates(pio_wlsmv)),label,est,se)

```

**## Get Monte Carlo confidence intervals (90%) for the above WLSMV-based  
## estimates**

```

set.seed(1234)
wlsmv_mc <- data.frame(monteCarloCI(pio_wlsmv, level = 0.9))
wlsmv_mc <- cbind(label= rownames(wlsmv_mc),wlsmv_mc) %>% subset(select=-est)

wlsmv_all <- merge (wlsmv_est, wlsmv_mc, by = "label", sort=F) %>% filter(lab

```

```

el %in% c("vc_p", "vc_pi", "vc_po", "vc_pio", "vc_i", "vc_o", "vc_io", "SFE", "TE", "R
RE", "G", "D", "CS_D")) %>% subset(select=-label)
colnames(wlsmv_all) = c("Estimate", "Standard Error", "90% CI - LL", "90% CI -
UL")
rownames(wlsmv_all) = c("Person", "Person × item", "Person × occasion", "Person
× item × occasion and other error", "Item", "Occasion", "Item × occasion", "G coe
fficient", "Specific-factor error", "Transient error", "Random-response error", "
Global D coefficient", "Cut-score specific D coefficient")

```

**Table S6.** *G Coefficients, D Coefficients, and Partitioning of Variance for GT pio CLRV Design*

|                                          | Estimate | Standard Error | 90% CI - LL | 90% CI - UL |
|------------------------------------------|----------|----------------|-------------|-------------|
| Person                                   | 1.00098  | 0.07373        | 0.87892     | 1.12206     |
| Person × item                            | 0.67676  | 0.02528        | 0.63524     | 0.71879     |
| Person × occasion                        | 0.07604  | 0.00805        | 0.06283     | 0.08917     |
| Person × item × occasion and other error | 0.37255  | 0.00978        | 0.35658     | 0.38863     |
| Item                                     | 0.30682  | 0.01914        | 0.27905     | 0.34205     |
| Occasion                                 | 0.00270  | 0.00158        | 0.00074     | 0.00599     |
| Item × occasion                          | 0.00217  | 0.00071        | 0.00190     | 0.00444     |
| G coefficient                            | 0.88622  | 0.00964        | 0.86918     | 0.90092     |
| Specific-factor error                    | 0.02996  | 0.00198        | 0.02696     | 0.03356     |
| Transient error                          | 0.06733  | 0.00783        | 0.05502     | 0.08095     |
| Random-response error                    | 0.01649  | 0.00116        | 0.01476     | 0.01863     |
| Global D coefficient                     | 0.87220  | 0.01017        | 0.85381     | 0.88739     |
| Cut-score specific D coefficient         | 0.97402  | 0.00209        | 0.97021     | 0.97713     |

### 3. Tables with Key Formulas for Illustrated Generalizability Theory Designs

**Table S7.** Formulas for Persons by Items Generalizability Theory Designs

|                                   |                                            |                                                                                                                                                                                                                                                                                                                                                                                                                                                                                  |
|-----------------------------------|--------------------------------------------|----------------------------------------------------------------------------------------------------------------------------------------------------------------------------------------------------------------------------------------------------------------------------------------------------------------------------------------------------------------------------------------------------------------------------------------------------------------------------------|
| Partitioning of variance          | Individual score level                     | $\hat{\sigma}_{Y_{pi}}^2 = \hat{\sigma}_p^2 + \hat{\sigma}_{pi,e}^2 + \hat{\sigma}_i^2$                                                                                                                                                                                                                                                                                                                                                                                          |
|                                   | Item mean score level                      | $\hat{\sigma}_{Y_{pI}}^2 = \hat{\sigma}_p^2 + \frac{\hat{\sigma}_{pi,e}^2}{n'_i}$                                                                                                                                                                                                                                                                                                                                                                                                |
| Absolute error variance component | Item variance                              | $\hat{\sigma}_i^2 = \frac{1}{n_i - 1} \sum_1^{n_i} (Intercept_i)^2$                                                                                                                                                                                                                                                                                                                                                                                                              |
| G and D coefficients              | $\hat{G}$ coefficient                      | $\frac{\hat{\sigma}_p^2}{\hat{\sigma}_p^2 + \left(\frac{\hat{\sigma}_{pi,e}^2}{n'_i}\right)}$                                                                                                                                                                                                                                                                                                                                                                                    |
|                                   | Global $\hat{D}$ coefficient               | $\frac{\hat{\sigma}_p^2}{\hat{\sigma}_p^2 + \left(\frac{\hat{\sigma}_{pi,e}^2}{n'_i} + \frac{\hat{\sigma}_i^2}{n'_i}\right)}$                                                                                                                                                                                                                                                                                                                                                    |
|                                   | Cut - score specific $\hat{D}$ coefficient | $\frac{\hat{\sigma}_p^2 + [(\bar{Y} - \text{Cut-score})^2 - \hat{\sigma}_{\bar{Y}}^2]}{\hat{\sigma}_p^2 + [(\bar{Y} - \text{Cut-score})^2 - \hat{\sigma}_{\bar{Y}}^2] + \left(\frac{\hat{\sigma}_{pi,e}^2}{n'_i} + \frac{\hat{\sigma}_i^2}{n'_i}\right)}$ <p>where <math>\hat{\sigma}_{\bar{Y}}^2 = \frac{\hat{\sigma}_p^2}{n'_p} + \frac{\hat{\sigma}_{pi,e}^2}{n'_p n'_i} + \frac{\hat{\sigma}_i^2}{n'_i}</math><br/> and corrects for bias (see Brennan &amp; Kane, 1977)</p> |

*Note.*  $\hat{\sigma}^2$  = estimated variance component,  $Y_{pi}$  = score for a particular person on a given item,  $Y_{pI}$  = mean across all items for a particular person,  $n_i$  = number of items for generalizability study, and  $n'_i$  = number of items for decision study.

**Table S8.** Formulas for Persons by Items by Occasions Generalizability Theory Designs

|                                   |                                            |                                                                                                                                                                                                                                                                                                                                                                                                                                                                                                                                                                                                                                                                                                                                                                                                  |
|-----------------------------------|--------------------------------------------|--------------------------------------------------------------------------------------------------------------------------------------------------------------------------------------------------------------------------------------------------------------------------------------------------------------------------------------------------------------------------------------------------------------------------------------------------------------------------------------------------------------------------------------------------------------------------------------------------------------------------------------------------------------------------------------------------------------------------------------------------------------------------------------------------|
| Partitioning of variance          | Individual score level                     | $\hat{\sigma}_{Y_{pio}}^2 = \hat{\sigma}_p^2 + \hat{\sigma}_{pi}^2 + \hat{\sigma}_{po}^2 + \hat{\sigma}_{pio,e}^2 + \hat{\sigma}_i^2 + \hat{\sigma}_o^2 + \hat{\sigma}_{io}^2$                                                                                                                                                                                                                                                                                                                                                                                                                                                                                                                                                                                                                   |
|                                   | Item mean score level                      | $\hat{\sigma}_{Y_{pio}}^2 = \hat{\sigma}_p^2 + \frac{\hat{\sigma}_{pi}^2}{n'_i} + \frac{\hat{\sigma}_{po}^2}{n'_o} + \frac{\hat{\sigma}_{pio,e}^2}{n'_i n'_o}$                                                                                                                                                                                                                                                                                                                                                                                                                                                                                                                                                                                                                                   |
| Absolute error variance component | Item variance                              | $\hat{\sigma}_i^2 = \frac{1}{n_i - 1} \sum_1^{n_i} (Item\ factor\ mean_i)^2$                                                                                                                                                                                                                                                                                                                                                                                                                                                                                                                                                                                                                                                                                                                     |
|                                   | Occasion variance                          | $\hat{\sigma}_o^2 = \frac{1}{n_o - 1} \sum_1^{n_o} (Occasion\ factor\ mean_o)^2$                                                                                                                                                                                                                                                                                                                                                                                                                                                                                                                                                                                                                                                                                                                 |
|                                   | Item $\times$ Occasion variance            | $\hat{\sigma}_{io}^2 = \frac{1}{(n_i \times n_o) - 1} \sum_1^{n_i \times n_o} (Intercept_{io})^2$                                                                                                                                                                                                                                                                                                                                                                                                                                                                                                                                                                                                                                                                                                |
| G and D coefficients              | $\hat{G}$ coefficient                      | $\frac{\hat{\sigma}_p^2}{\hat{\sigma}_p^2 + \left( \frac{\hat{\sigma}_{pi}^2}{n'_i} + \frac{\hat{\sigma}_{po}^2}{n'_o} + \frac{\hat{\sigma}_{pio,e}^2}{n'_i n'_o} \right)}$                                                                                                                                                                                                                                                                                                                                                                                                                                                                                                                                                                                                                      |
|                                   | Global $\hat{D}$ coefficient               | $\frac{\hat{\sigma}_p^2}{\hat{\sigma}_p^2 + \left( \frac{\hat{\sigma}_{pi}^2}{n'_i} + \frac{\hat{\sigma}_{po}^2}{n'_o} + \frac{\hat{\sigma}_{pio,e}^2}{n'_i n'_o} + \frac{\hat{\sigma}_i^2}{n'_i} + \frac{\hat{\sigma}_o^2}{n'_o} + \frac{\hat{\sigma}_{io}^2}{n'_i n'_o} \right)}$                                                                                                                                                                                                                                                                                                                                                                                                                                                                                                              |
|                                   | Cut - score specific $\hat{D}$ coefficient | $\frac{\hat{\sigma}_p^2 + [(\bar{Y} - Cut\text{-}score)^2 - \hat{\sigma}_{\bar{Y}}^2]}{\hat{\sigma}_p^2 + [(\bar{Y} - Cut\text{-}score)^2 - \hat{\sigma}_{\bar{Y}}^2] + \left( \frac{\hat{\sigma}_{pi}^2}{n'_i} + \frac{\hat{\sigma}_{po}^2}{n'_o} + \frac{\hat{\sigma}_{pio,e}^2}{n'_i n'_o} + \frac{\hat{\sigma}_i^2}{n'_i} + \frac{\hat{\sigma}_o^2}{n'_o} + \frac{\hat{\sigma}_{io}^2}{n'_i n'_o} \right)}$ <p>where <math>\hat{\sigma}_{\bar{Y}}^2 = \frac{\hat{\sigma}_p^2}{n_p} + \frac{\hat{\sigma}_{pi}^2}{n_p n'_i} + \frac{\hat{\sigma}_{po}^2}{n_p n'_o} + \frac{\hat{\sigma}_{pio,e}^2}{n_p n'_i n'_o} + \frac{\hat{\sigma}_i^2}{n'_i} + \frac{\hat{\sigma}_o^2}{n'_o} + \frac{\hat{\sigma}_{io}^2}{n'_i n'_o}</math><br/> and corrects for bias (see Brennan &amp; Kane, 1977)</p> |

*Note.*  $\hat{\sigma}^2$  = estimated variance component,  $Y_{pio}$  = score for a particular person on a given combination of item and occasion,  $Y_{pio}$  = mean across all items and occasions for a particular person,  $n_i$  = number of items for generalizability study,  $n_o$  = number of occasions for generalizability study,  $n'_i$  = number of items for decision study, and  $n'_o$  = number of occasions for decision study.

#### **4. Abbreviations Used Throughout the Supplement**

CI - LL: Confidence Interval - Lower Limit

CI - UL: Confidence Interval - Upper Limit

GT: Generalizability Theory

ULS: Unweighted Least Squares

WLSMV: Diagonally Weighted Least Squares in R

## References

- Brennan, R. L., & Kane, M. T. (1977). An index of dependability for mastery tests. *Journal of Educational Measurement*, 14, 277–289. <https://dx.doi.org/10.1111/j.1745-3984.1977.tb00045.x>
- Crick, J. E., & Brennan, R. L. (1983). Manual for GENOVA: *A generalized analysis of variance system* (American College Testing Technical Bulletin 43). Iowa City: ACT, Inc.
- Edwards, S. M. (2019). *lemon: Freshing Up your “ggplot2” Plots*. R package version 0.4. 3. Retrieved from <https://cran.r-project.org/web/packages/lemon>.
- Goldberg, L. R. (1999). A broad-bandwidth, public-domain, personality inventory measuring the lower-level facets of several Five-Factor models. In I. Mervielde, I. J. Deary, F. de Fruyt, & F. Ostendorf (Eds.). *Personality psychology in Europe* (Vol. 7, pp. 7–28). Tilburg: Tilburg University Press.
- Jorgensen, T. D., Pornprasertmanit, S., Schoemann, A. M., & Rosseel, Y. (2022). *semTools: Useful tools for structural equation modeling*. R package version 0.5-6. Retrieved from <https://CRAN.R-project.org/package=semTools>.
- Revelle W (2022). *psych: Procedures for Psychological, Psychometric, and Personality Research*. Northwestern University, Evanston, Illinois. R package version 2.2.9. Retrieved from <https://CRAN.R-project.org/package=psych>.
- Rosseel, Y. (2012). lavaan: An R Package for Structural Equation Modeling. *Journal of Statistical Software*, 48(2), 1-36. doi: 10.18637/jss.v048.i02.
- Rosseel, Y., Jorgensen, T. D., & Rockwood, N. (2023). Package ‘lavaan’. R package version (0.6-15). Retrieved from <https://cran.r-project.org/web/packages/lavaan/lavaan.pdf>
- Wickham, H., François, R., Henry, L., & Müller, K. (2015). *dplyr: A Grammar of Data Manipulation*. R package version 1.0.8. Retrieved from <https://CRAN.R-project.org/package=dplyr>.
- Xie Y (2022). *knitr: A General-Purpose Package for Dynamic Report Generation in R*. R package version 1.41. Retrieved from <https://yihui.org/knitr>.
